# Supplementary material for: Effective surface passivation with 4-bromo-benzonitrile to enhance the performance of perovskite solar cells
Source: Royal Society of Chemistry journal article supplement (doi:10.1039/d1tc04615b), 2021-01-01
Supplement: d1tc04615b1.pdf [file d1tc04615b1.pdf]

## Electronic Supplementary Information

### Effective surface passivation with 4-bromo-benzonitrile to enhance the performance of perovskite solar cells

*Jiahui Li,<sup>a</sup> Fei Gao,<sup>a\*</sup> Jialun Wen,<sup>a</sup> Zhuo Xu,<sup>a</sup> Chaoqun Zhang,<sup>a</sup> Xiaodong Hua,<sup>a</sup> Xuediao Cai,<sup>a\*</sup> Yuanrui Li,<sup>a</sup> Bonan Shi,<sup>a</sup> Yu Han,<sup>a</sup> Xiaodong Ren,<sup>a</sup> and Shengzhong (Frank) Liu<sup>a,b\*</sup>*

<sup>a</sup> Key Laboratory of Applied Surface and Colloid Chemistry, National Ministry of Education; Shaanxi Key Laboratory for Advanced Energy Devices; Shaanxi Engineering Lab for Advanced Energy Technology, School of Materials Science and Engineering, Shaanxi Normal University, Xi'an 710119, China.

<sup>b</sup> Dalian National Laboratory for Clean Energy; iChEM, Dalian Institute of Chemical Physics, Chinese Academy of Sciences, Dalian 116023, China

\*Corresponding author.

*E-mail address:* feigao@snnu.edu.cn, [xdcai@snnu.edu.cn](mailto:xdcai@snnu.edu.cn), [liusz@snnu.edu.cn](mailto:liusz@snnu.edu.cn) ;

*Fax:* +86 29 81530702

## **Films Preparation and Solar Cell Fabrication**

FTO glass was cleaned ultrasonically using 2% Hellmanex aqueous solution, ethanol and ultra-pure water sequentially for 25 min each, and processed in an O<sub>2</sub> plasma for 10 min. A TiO<sub>2</sub> film of ~ 30 nm thickness was prepared on the FTO glass by chemical-bath deposition using 0.2 M TiCl<sub>4</sub> aqueous solution at 70°C for 1 h. The TiO<sub>2</sub>/FTO sample was annealed at 200°C for 30 min. The perovskite precursor solution was prepared by adding FAI (245.1 mg), PbI<sub>2</sub> (656.9 mg), PbBr<sub>2</sub> (27.5 mg), MACl (33 mg), and MABr (8.4 mg) into 1 mL DMF/DMSO (8 : 1, v/v), which was then vibrated for 4 h. Then, the PBBN was dissolved in chlorobenzene (CB) with various concentrations for the surface passivation of perovskite films.

The prepared perovskite precursor solution was spin-coated onto TiO<sub>2</sub>/FTO at 4000 rpm for 30 s. 0.15 mL chlorobenzene was dripped on the spinning sample 25 s prior to the end of the process, and then the film was annealed at 150°C for 20 min. To passivate the perovskite film, 50 µl of PBBN/CB solution was spin-coated onto the perovskite film at 5000 rpm for 30 s. The film was then heated at 100°C for 10 min. A spiro-OMeTAD solution, consisting of 90 mg spiro-OMeTAD, 36 µL t-BP, and 22 µL of LiTFSI solution (520 mg LiTFSI in 1 mL acetonitrile) in 1 mL of chlorobenzene, was spin-coated onto the perovskite films at 5000 rpm for 30 s. All processes were performed in a nitrogen-filled glovebox. Finally, a 60 nm gold electrode with area of 3 mm × 3 mm was deposited onto the spiro-OMeTAD film by vacuum evaporation.

## **Characterization and Measurement**

X-ray diffraction (XRD) spectra were recorded by an x-ray diffractometer (XRD, DX-2700) using Cu K α radiation ( $\lambda=0.154$  nm). Top-view and cross-sectional

scanning electron microscopy (SEM) images were gotten on a field emission SEM (FESEM, SU-8020, Hitachi). Atomic force microscopy (AFM) images were recorded by a Bruker Dimension FastScan Scanning Probe Microscope (SPM) in the tapping mode. Ultraviolet-visible spectra were obtained using a spectrophotometer (Lambda 950, Perkin-Elmer). Photoluminescence (PL) spectra and time-resolved PL (TRPL) spectra were collected by exciting the  $(\text{FAPbI}_3)_{0.95}(\text{MAPbBr}_3)_{0.05}$  films deposited on compact  $\text{TiO}_2/\text{FTO}$  substrate using a PicoQuant Fluo Time 300 with 510 nm laser excitation pulsed at a frequency of 40 MHz for PL or 1 MHz for TRPL. Fourier transform infrared (FTIR) spectra were acquired with a Bruker VERTEX 70 in the range of  $4000\text{--}400\text{ cm}^{-1}$ . The elemental chemical states of the perovskite films were measured by X-ray photoelectron spectroscopy (XPS, Thermo K-Alpha VGS) using the Fermi edge as the energy reference. The  $J\text{--}V$  curves of the PSCs were measured on a Keithley 2400 SourceMeter in ambient conditions at room temperature. The simulated sunlight source was a 450-W xenon lamp and the illumination intensity was calibrated to  $100\text{mWcm}^{-2}$ . The power output of the AM 1.5G Oriel solar simulator was calibrated with an NREL-traceable KG5-filtered silicon reference cell. The fabricated PSCs were tested from 2 to  $-0.1\text{ V}$  at a scan rate of  $0.1\text{ Vs}^{-1}$ , scan of  $0.02\text{ V}$ , and scan delay time of 10 ms. External quantum efficiency (EQE) measurement was performed using a QTest Station 2000ADI system (Crowntech Inc.), including a tungsten-halogen lamp, a Si detector and a monochromator. Electrochemical Impedance spectroscopy (IS) was measured by an electrochemical workstation (IM6ex, Zahner, Germany) in the frequency range from 1MHz to 1Hz under  $0.9\text{ V}$  under dark. The water contact angles of perovskite films were measured by a DataPhysics OCA 20.

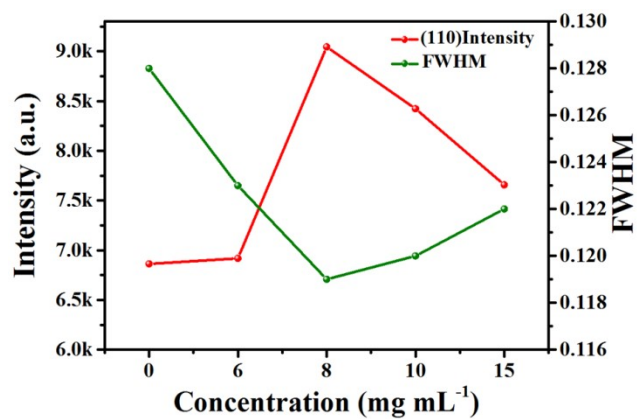

**Figure S1** Intensity and full width at half maximum (FWHM) of the main (110) XRD peak of the perovskite films treated with different concentration PBBN.

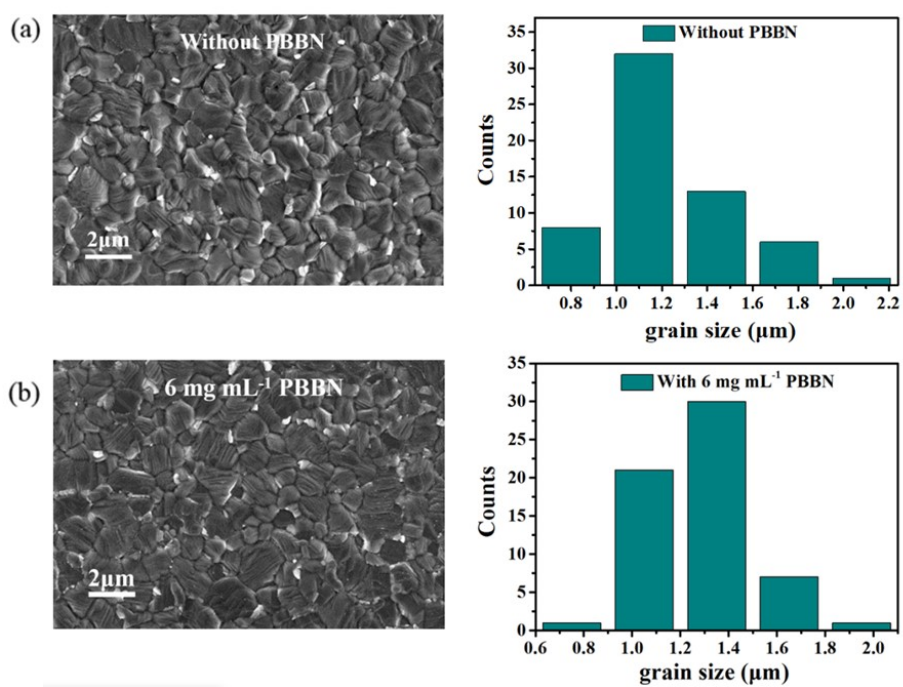

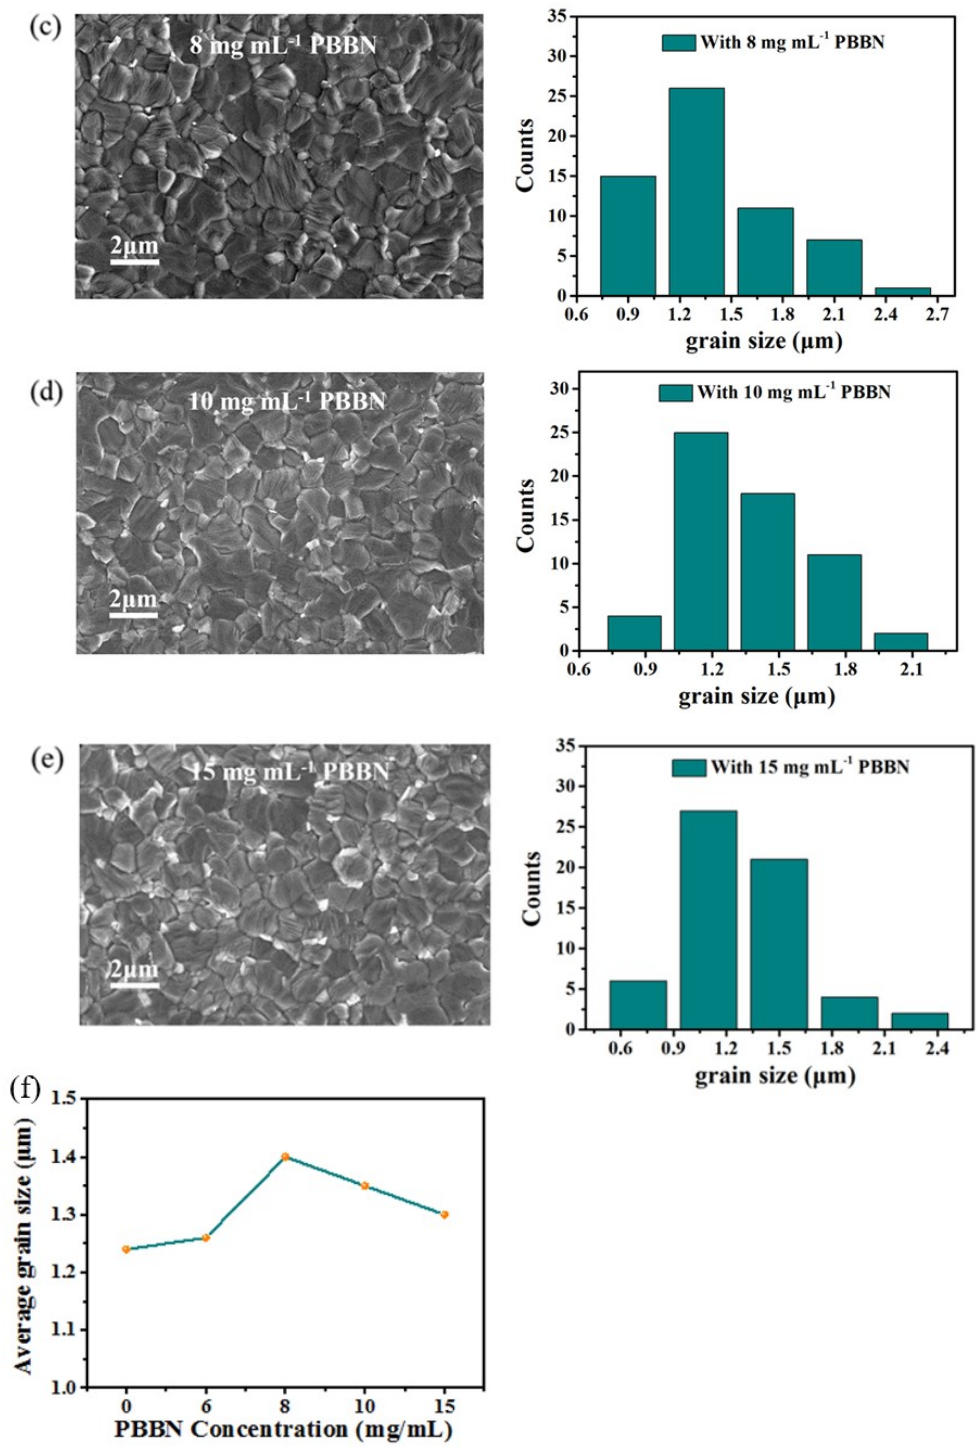

**Figure S2** Surface SEM images and Grain-size distributions of the perovskite films treated without and with different concentration PBBN (a~e); Average grain size of the perovskite films as a function of PBBN concentration (f).

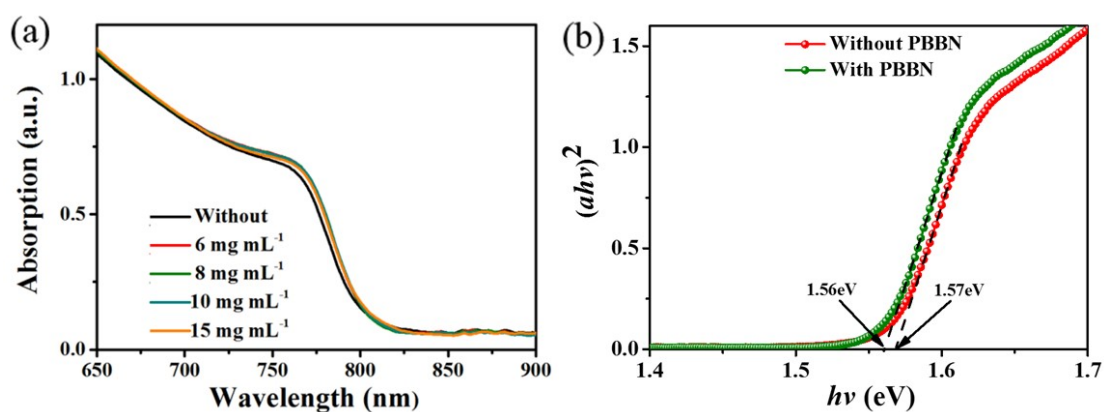

**Figure S3** Absorption spectra of perovskite films treated by PBBN with different concentrations (a). Tauc plots:  $(\alpha hv)^2$  vs  $h\nu$  curves of perovskite films with and without PBBN treatment (b).

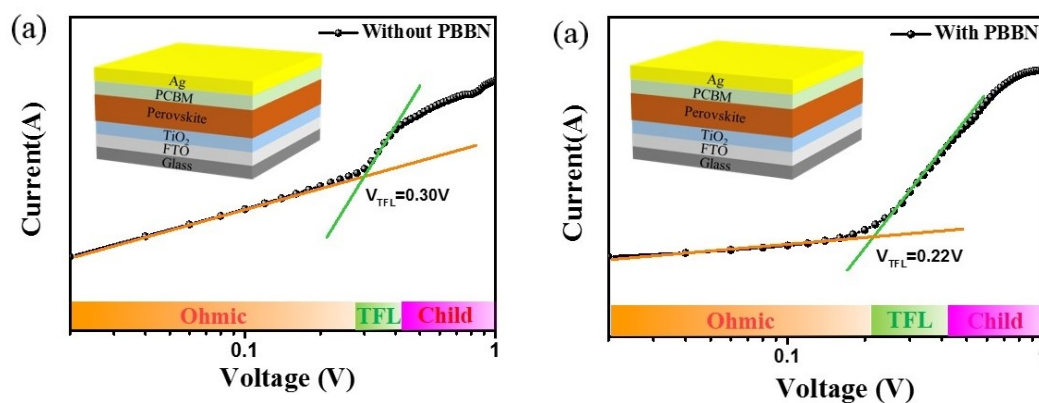

**Figure S4** Dark current-voltage properties of the electron-only devices treated without (a) and with PBBN (b).

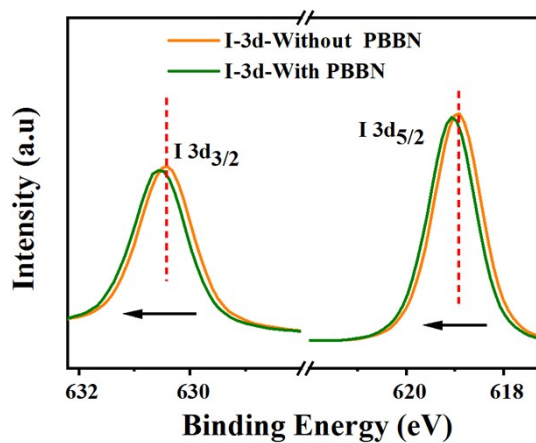

**Figure S5** XPS spectra of I 3d of the perovskite films without and with PBBN passivation.

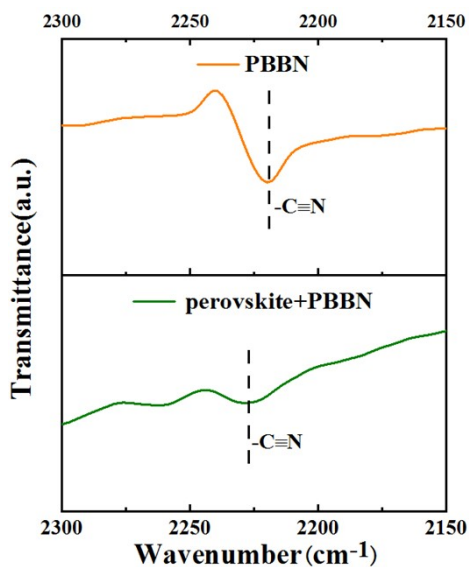

**Figure S6** Fourier transform infrared spectra (FTIR) of pure PBBN and perovskite - PBBN mixture.

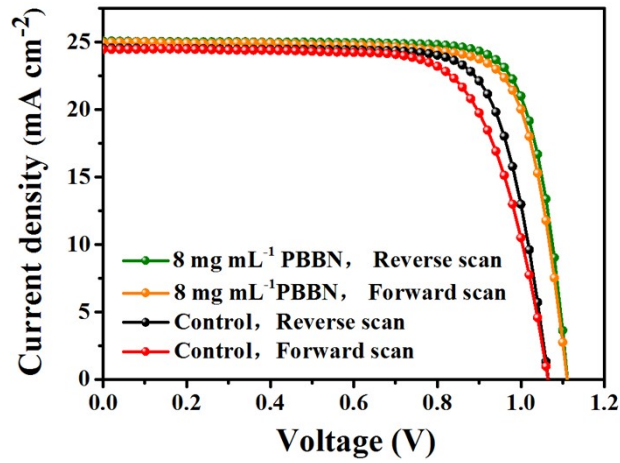

**Figure S7** J–V characteristic curves under reverse/forward scanning directions of the PSCs treated without and with PBBN.

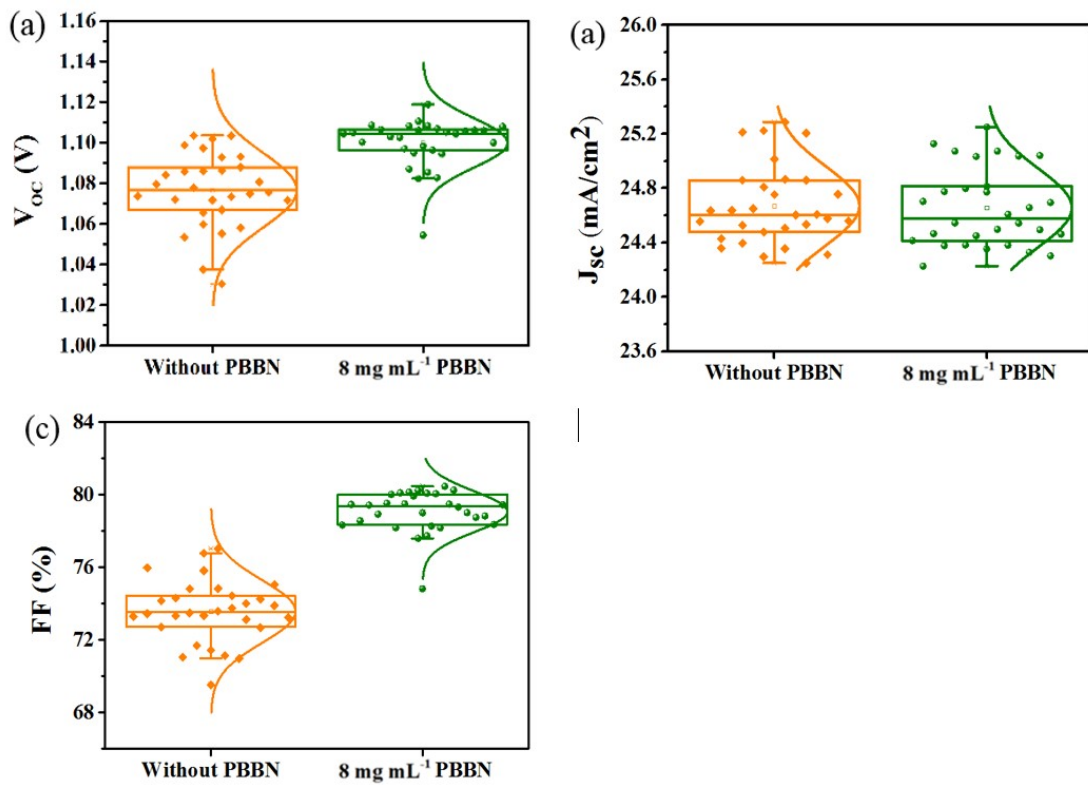

**Figure S8** Statistics of  $V_{OC}$ ,  $J_{SC}$ , and FF of the untreated and PBBN treated 30 devices.



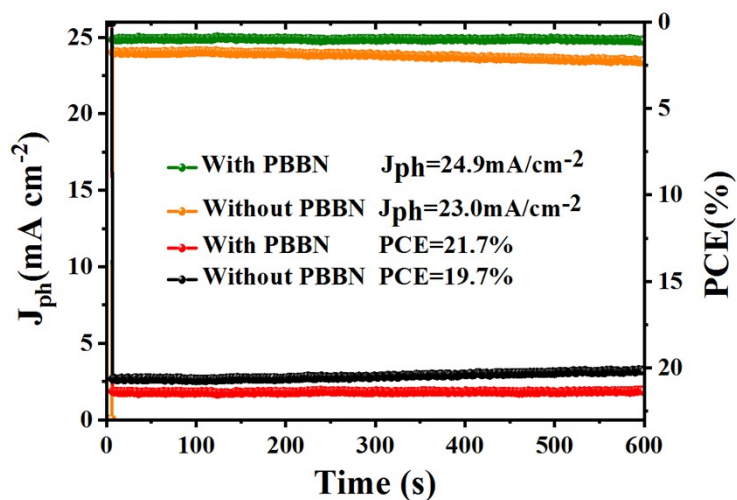

**Figure S9** Stable output properties of current density and PCE measured as illumination time of the PSCs without and with PBBN treatment.

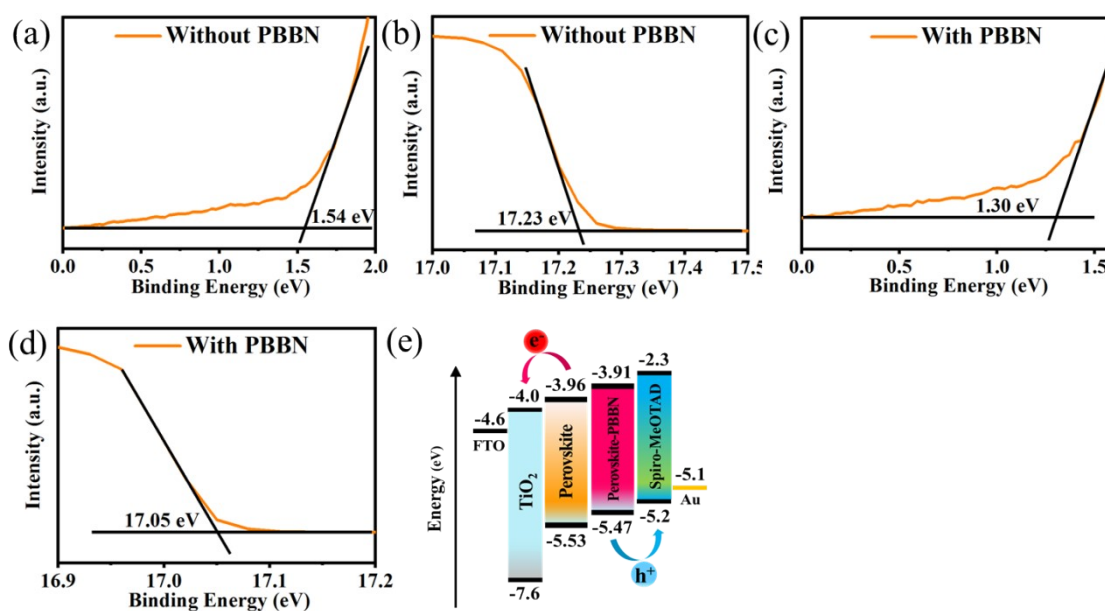

**Figure S10** UPS spectra of the perovskite without (a, b) and with (c, d) PBBN treatment for the  $E_{onset}$  range (a, c) and  $E_{cutoff}$  range (b, d). Energy levels and band structure of PVCs (e).

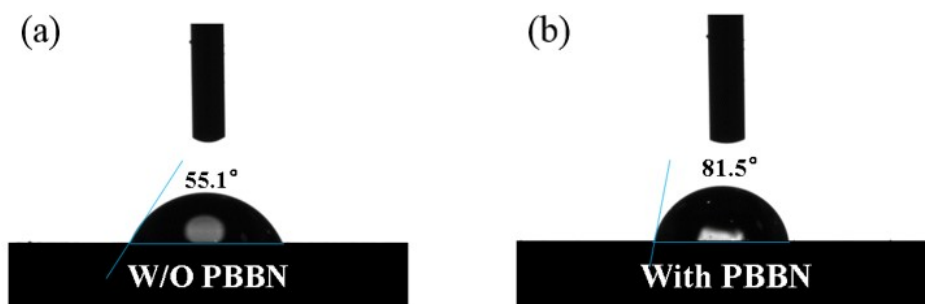

**Figure S11** Contact angle of a water droplet on the top of the perovskite films without (a) and with (b) PBBN treatment.

**Table S1** The fitted values of  $\tau_1$ ,  $\tau_2$ ,  $A_1$ ,  $A_2$  and the calculated  $\tau_{ave}$  of the perovskite films without and with PBBN treatment.

| 8 mg mL <sup>-1</sup> PBBN | $\tau_{ave}$ (ns) | $\tau_1$ (ns) | $A_1$ (%) | $\tau_2$ (ns) | $A_2$ (%) |
|----------------------------|-------------------|---------------|-----------|---------------|-----------|
| w/o                        | 70                | 42            | 642.1     | 121           | 3462.4    |
| With                       | 363               | 136           | 789.2     | 542           | 2474.9    |

**Table S2** Photovoltaic parameters of PSCs treated with different concentrations PBBN.

| PBBN                   | $V_{OC}$ (v) | $J_{SC}$ (mA cm <sup>-2</sup> ) | FF (%) | PCE (%) |
|------------------------|--------------|---------------------------------|--------|---------|
| Without                | 1.06         | 24.56                           | 76.79  | 20.09   |
| 6 mg mL <sup>-1</sup>  | 1.06         | 24.64                           | 79.00  | 20.73   |
| 8 mg mL <sup>-1</sup>  | 1.11         | 25.09                           | 79.92  | 22.28   |
| 10 mg mL <sup>-1</sup> | 1.10         | 24.91                           | 78.7   | 21.64   |
| 15 mg mL <sup>-1</sup> | 1.09         | 24.88                           | 77.88  | 21.25   |

**Table S3** J–V characteristic curves under reverse/forward scanning directions of the PSC without PBBN treatment.

|              | $V_{oc}$ (v) | $J_{sc}$ (mA cm <sup>-2</sup> ) | FF (%) | PCE (%) | H-index |
|--------------|--------------|---------------------------------|--------|---------|---------|
| Reverse scan | 1.065        | 24.56                           | 76.79  | 20.09   | 0.057   |
| Forward scan | 1.065        | 24.49                           | 72.58  | 18.94   |         |

**Table S4** J–V characteristic curves under reverse/forward scanning directions of the PSC with PBBN treatment.

|              | $V_{oc}$ (v) | $J_{sc}$ (mA cm <sup>-2</sup> ) | FF (%) | PCE (%) | H-index |
|--------------|--------------|---------------------------------|--------|---------|---------|
| Reverse scan | 1.111        | 25.09                           | 79.92  | 22.28   | 0.029   |
| Forward scan | 1.110        | 24.98                           | 77.96  | 21.64   |         |

**Table S5** Fitted resistances of the perovskite films without and with PBBN treatment.

| PBBN      | $R_s(\Omega)$ | $C_{cr}$ ( F )       | $R_{rec}$ ( $\Omega$ ) |
|-----------|---------------|----------------------|------------------------|
| Without   | 16.64         | $3.0 \times 10^{-9}$ | 559.5                  |
| With PBBN | 16.63         | $7.2 \times 10^{-9}$ | 2213                   |
